# Supplementary material
Source: PubMed Central journal article supplement (PMC2775981)

Supplemental Figure 2

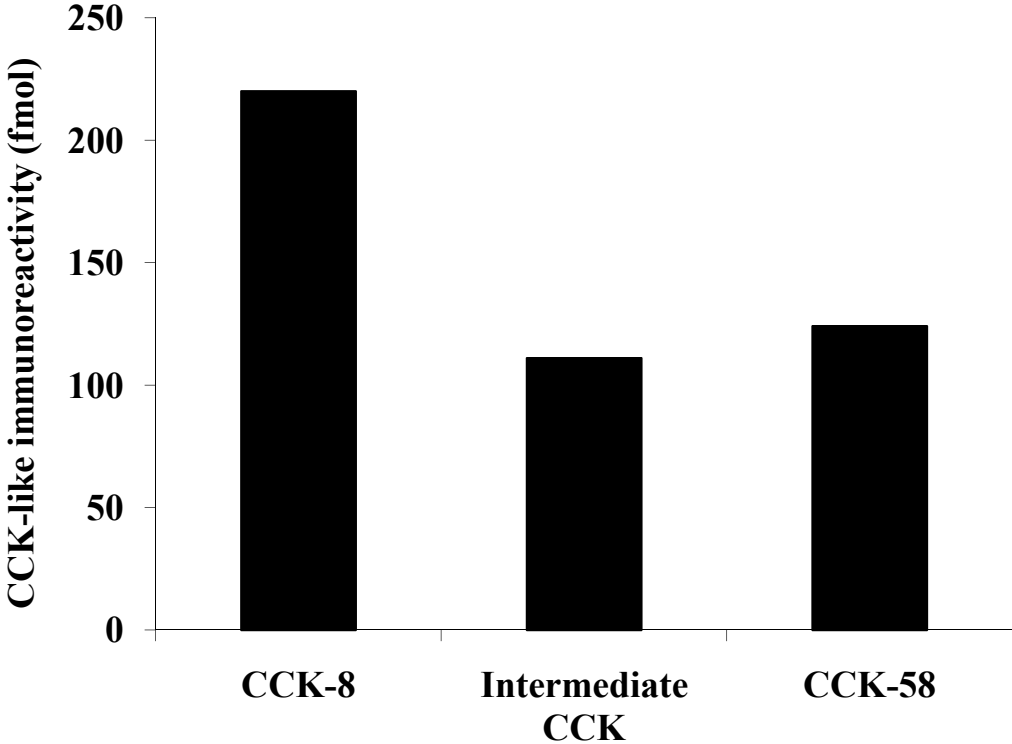

Supplement: en.2009-0697_2.pdf [file en.2009-0697_2.pdf]
